# Supplementary material for: Sustainability of Smallholders in the Local Food System: A Study of Chicken Layer Farms in Nakhon Phanom Province, Northeast Thailand
Source: MDPI journal article supplement (doi:10.3390/su14105997), 2022-05-15
Supplement: s1 [file s1]

## Semi-Structured Interview Guides

For Egg Layer Farmers in Ban Klanng Sub-District, Nakhon Phanom Province, Thailand

No. of KI : \_\_\_\_\_

Date : \_\_\_\_\_

Time : \_\_\_\_\_

Interviewer Name : \_\_\_\_\_

1. Household data
  - 1.1. Age of KI and numbers of household members.
  - 1.2. Employed and labours of all household members.
  - 1.3. Details of land size and land use (all activities)
  - 1.4. Annual total net incomes of household and sources of incomes.
  - 1.5. Backgrounds before undertaking chicken layer farmer.
  - 1.6. When household started their egg layer farms.
  - 1.7. The reasons they choose to invest in chicken layer farms.
2. Production cycles and Practices
  - 2.1 Chicken Barn Construction, Preparation
    - The structure and design
    - Size, materials and materials source.
    - Costs
  - 2.2 Nursery and Feeds (Sources of breeds, nursery, vaccination, etc.
  - 2.3 Daily activity of egg farms and Manure management
  - 2.4 Investments and incomes
  - 2.5 Preventive Measures for Disease Transmission.
3. Distribution of Farm Products (channels, transportation, etc.)
4. Views of egg sellers

-----
