# Supplementary material for: Sustainability of Smallholders in the Local Food System: A Study of Chicken Layer Farms in Nakhon Phanom Province, Northeast Thailand
Source: MDPI journal article supplement (doi:10.3390/su14105997), 2022-05-15
Supplement: s1 [file s1]

Archive with 1 entries (1 files):
- sustainability-1686282-supplementary.pdf
